# Supplementary material
Source: Springer Nature journal article supplement (https://www.springermedizin.de/resource/supplementary/12936_2011_2031_MOESM2_ESM.pdf/9543354)

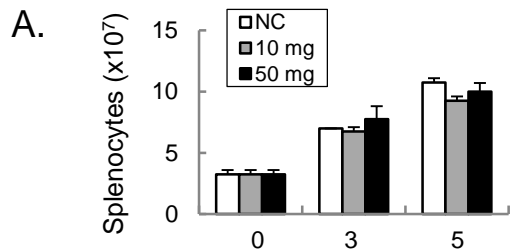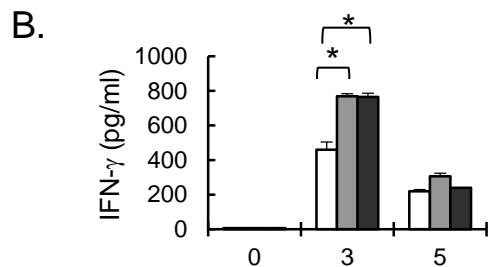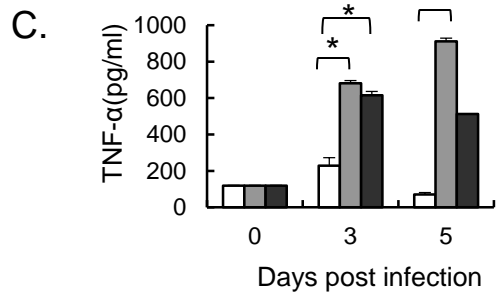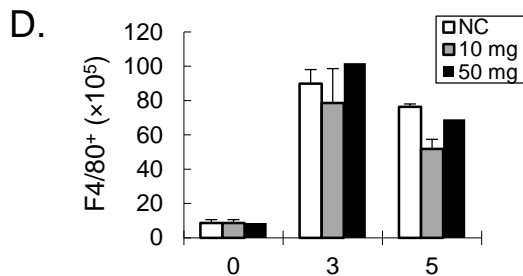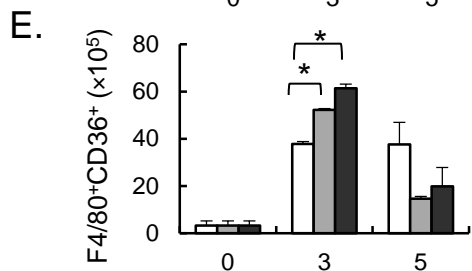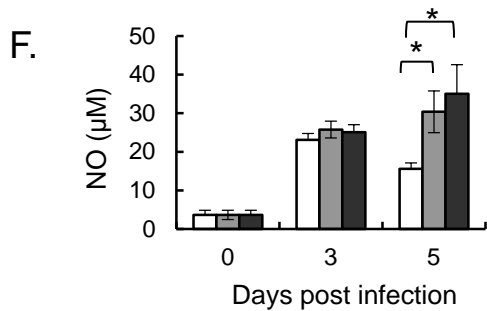

Supplement: MOESM2 [file 9543354]
